# Supplementary material for: Controllable physicochemical properties of WOx thin films grown under glancing angle
Source: publisher site journal article supplement (doi:10.3762/bjnano.15.31), 2024-04-02
Supplement: Additional file 1 [file 2190-4286-15-31-S1.pdf]

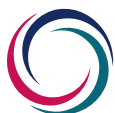

## Supporting Information

for

### **Controllable physicochemical properties of WO<sub>x</sub> thin films grown under glancing angle**

Rupam Mandal, Aparajita Mandal, Alapan Dutta, Rengasamy Sivakumar, Sanjeev Kumar Srivastava and Tapobrata Som

*Beilstein J. Nanotechnol.* **2024**, *15*, 350–359. [doi:10.3762/bjnano.15.31](https://doi.org/10.3762/bjnano.15.31)

## Supplementary data

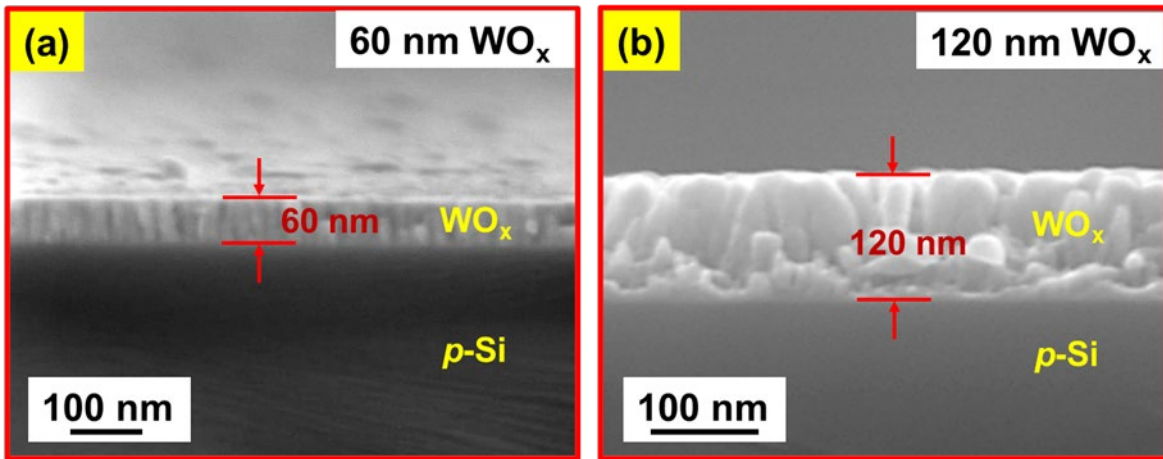

**Figure S1:** (a, b) XSEM images of 60 and 120 nm thick WO<sub>x</sub> thin films deposited on p-Si substrates.

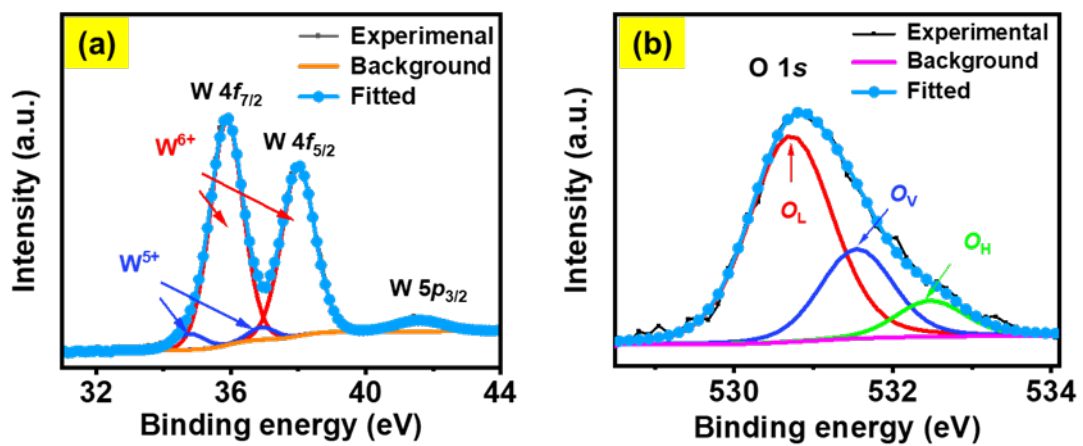

**Figure S2:** (a, b) XPS W 4f and O 1s core level spectra of as-deposited WO<sub>x</sub> films having a thickness of 30 nm.

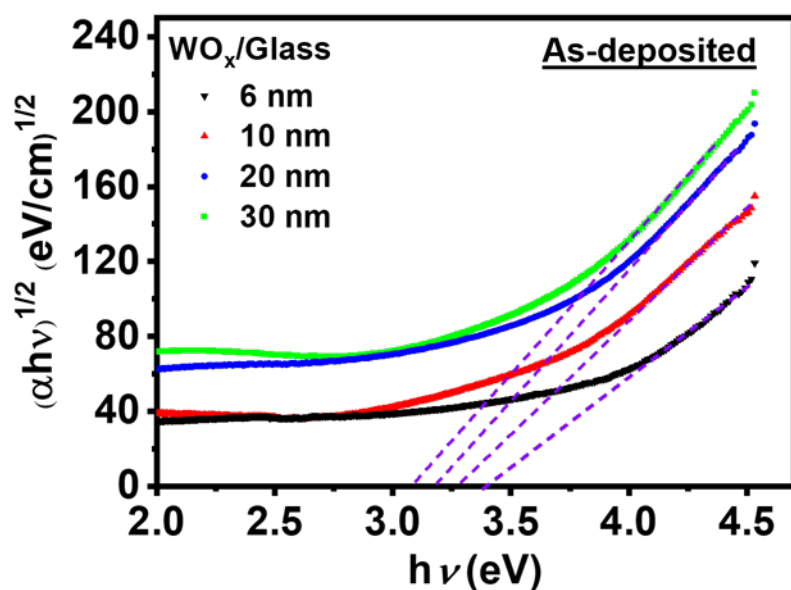

**Figure S3:** Tauc plots of the as-deposited nanostructured  $\text{WO}_x$  for different film thicknesses. The dashed lines indicate the intercept of the extrapolates on the x axis, providing the corresponding bandgap energies.

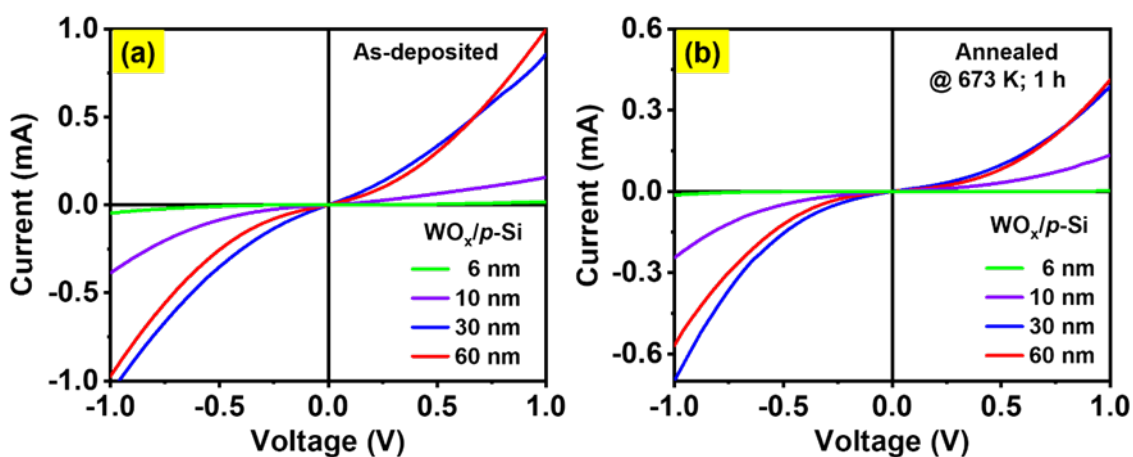

**Figure S4:** Linear  $I$ - $V$  curves of (a) as-deposited and (b) annealed  $\text{WO}_x/p\text{-Si}$  heterostructures for different  $\text{WO}_x$  film thicknesses.

**Table S1:** Comparison between the present work and previously reported works on nanostructured WO<sub>3</sub> films.

| Film thickness (nm) | Growth technique                 | Target used     | Growth geometry | Optical studies                                  | Electrical studies               | Local probe studies | Post-growth annealing          | Ref.         |
|---------------------|----------------------------------|-----------------|-----------------|--------------------------------------------------|----------------------------------|---------------------|--------------------------------|--------------|
| 25–54               | DC sputtering                    | W               | GLAD            | transmittance, bandgap, refractive index         | <i>I–V</i>                       | NA                  | 400 °C                         | [1]          |
| 500                 | reactive DC magnetron sputtering | W               | GLAD            | NA                                               | current response for gas sensing | NA                  | 400 and 500 °C                 | [2]          |
| 100                 | pulsed DC magnetron sputtering   | W               | GLAD            | none (only structural and morphological studies) | NA                               | NA                  | 500 °C                         | [3]          |
| 270, 500            | e-beam evaporation               | WO <sub>3</sub> | GLAD            | transmittance                                    | <i>I–V</i>                       | NA                  | 100, 200, 300, 350, and 400 °C | [4]          |
| 1000                | reactive DC magnetron sputtering | W               | GLAD            | transmittance, refractive index, bandgap         | NA                               | NA                  | NA                             | [5]          |
| 300                 | reactive DC magnetron sputtering | W               | GLAD            | transmittance                                    | NA                               | NA                  | NA                             | [6]          |
| 6–120 nm            | RF magnetron sputtering          | WO <sub>3</sub> | GLAD            | transmittance, bandgap                           | <i>I–V</i>                       | Local work function | 400 °C                         | present work |

## References

1. Rydosz, R.; Dyndał, K.; Kollbe, K.; Andrysiewicz, W.; Sitarz, M.; Marszałek, K. *Vacuum* **2020**, *177*, 109378. doi:10.1016/j.vacuum.2020.109378
2. Horprathum, M.; Frankel, D. J.; Lad, R. J. *Sens. Actuators, B* **2013**, *176*, 685–691. doi:10.1016/j.snb.2012.09.077
3. Deniz, D.; Frankel, D. J.; Lad, R. J. *Thin Solid Films* **2010**, *518*, 4095–4099. doi:10.1016/j.tsf.2009.10.153
4. Yuan, J.; Wang, B.; Wang, H.; Chai, Y.; Jin, Y.; Qi, H.; Shao, H. *Appl. Surf. Sci.* **2018**, *447*, 471–478. doi:10.1016/j.apsusc.2018.03.248
5. Sakkas, C.; Rauch, J.-Y.; Cote, J.-M.; Tissot, V.; Gavaille, J.; Martin, N. *Coatings* **2021**, *11*, 438. doi:10.3390/coatings11040438
6. Salawan, C.; Aiempanakit, M.; Aiempanakit, K.; Chananonawathorn, C.; Eiamchai, P.; Horprathum, M. *Mater. Today: Proc.* **2017**, *4*, 6423–6429. doi:10.1016/j.matpr.2017.06.148
